# Supplementary material for: Systematic Characterization and Longitudinal Study Reveal Distinguishing Features of Human Milk Oligosaccharides in China
Source: PubMed Central journal article supplement (PMC7382630; doi:10.1093/cdn/nzaa113), 2020-07-02
Supplement: nzaa113_supplemental_file.pdf [file nzaa113_supplemental_file.pdf]

**Systematic characterization and longitudinal study reveal distinguishing features of human milk oligosaccharides in China (Jiayi Wu)**  
**Online Supplementary Material**

**Supplemental Table 1** Characteristics of studied Chinese mothers and infants.

|         | Charateristics                        | Mean $\pm$ SD <sup>1</sup> |
|---------|---------------------------------------|----------------------------|
| Mothers | Age (years)                           | 30.6 $\pm$ 4.3             |
|         | Weight (kg)                           | 55.7 $\pm$ 7.4             |
|         | Height (cm)                           | 159 $\pm$ 5                |
|         | BMI <sup>2</sup> (kg/m <sup>2</sup> ) | 22.1 $\pm$ 2.9             |
|         | Parity                                | 1.4 $\pm$ 0.5              |
|         | Cesarean delivery (%)                 | 52.9                       |
| Infants | Males (%)                             | 63.3                       |
|         | Gestation age at birth (weeks)        | 39.0 $\pm$ 1.2             |

<sup>1</sup>Standard deviation, SD.

<sup>2</sup>Body Mass Index (BMI) = Weight(kg) / Height<sup>2</sup>(m<sup>2</sup>).

**Supplemental Figure 1** HMOs composition in different Lewis blood types.

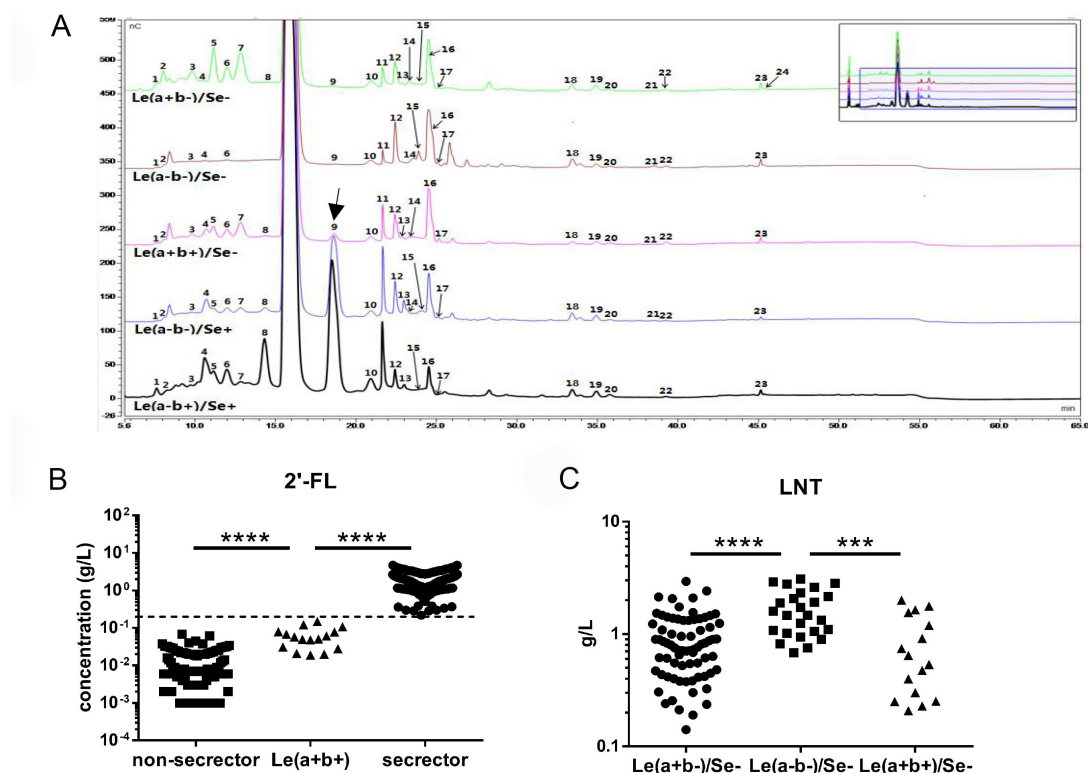

(A) Representative HPAEC chromatograms of 24 HMOs in milk samples of different Lewis blood types (Le(a±b±)) and secretor types (Se±). 1. LNnDFH, 2. LNDFH II, 3. DFLNH, 4. LNDFH I, 5. 3-FL, 6. A-Type-6, 7. LNFP II, 8. LDFT, 9. 2'-FL, 10. LNT2, 11. LNFP I, 12. LNnT, 13. LNnFP, 14. LNFP V, 15. p-LNnH&LNnH, 16. LNT, 17. LNnO, 18. LSTc, 19. 6'-SL, 20. 3'-SL, 21. LSTa, 22. LSTb, 23. DSLNT, 24. DS-L. (B) 2'-FL concentrations and (C) LNT concentrations in milk of different blood types (le(a±b±)) and secretor types (Se±). \*\*\*  $P < 0.001$ , \*\*\*\*  $P < 0.0001$ .

**Supplemental Figure 2** Concentrations of  $\alpha$ -1-2-fucosyltransferase products

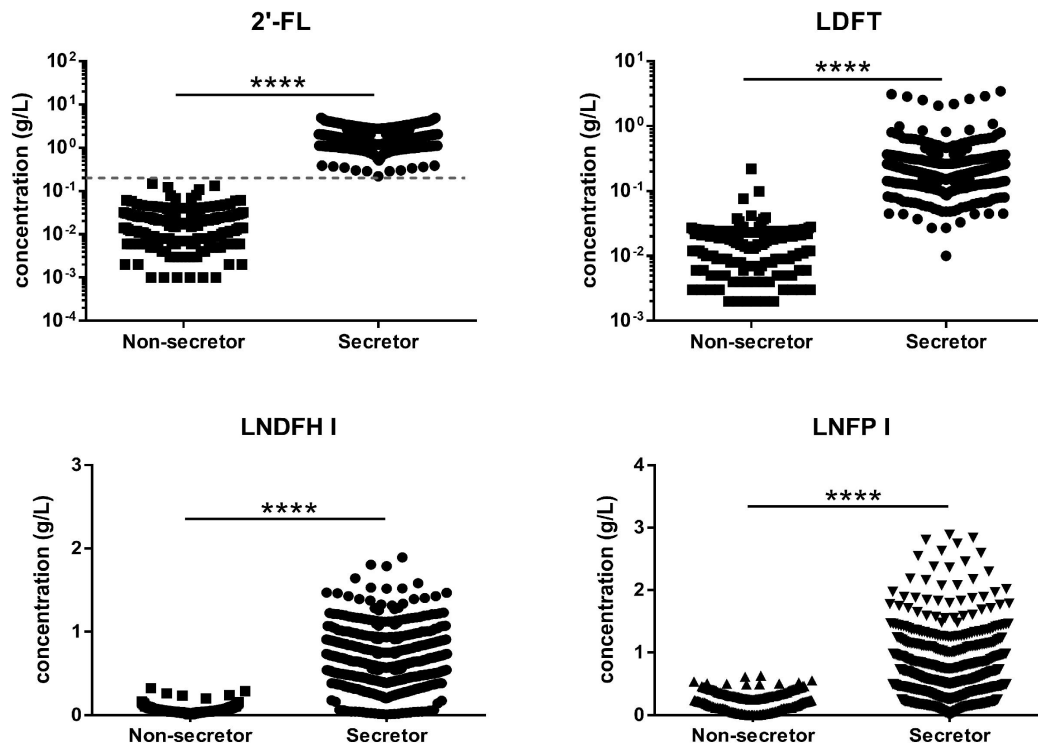

2'-FL, LDFT, LNDFH I and LNFP I in milk of defined secretors and non-secretors according to 2'-FL concentration. Dash line indicated 0.2 g/L.

\*\*\*\*  $P < 0.0001$ .

## Supplemental Figure 3 Concentrations (g/L) of 24 HMOs in milk of secretors and non-secretors during lactation.

|          | Day of lactation (Secretor) |             |              |             |             |             | Day of lactation (Non-secretor) |              |               |               |              |               |
|----------|-----------------------------|-------------|--------------|-------------|-------------|-------------|---------------------------------|--------------|---------------|---------------|--------------|---------------|
|          | 3<br>n=25                   | 7<br>n=27   | 21<br>n=25   | 42<br>n=15  | 77<br>n=10  | 168<br>n=7  | 3<br>n=13                       | 7<br>n=12    | 21<br>n=10    | 42<br>n=10    | 77<br>n=4    | 168<br>n=2    |
| <b>A</b> |                             |             |              |             |             |             |                                 |              |               |               |              |               |
| LNnDFH   | 0.06±0.01a                  | 0.04±0.00ab | 0.02±0.00b   | 0.03±0.00ab | 0.05±0.01ab | 0.05±0.01ab | 0.06±0.01                       | 0.05±0.01    | *0.03±0.00    | 0.08±0.03     | 0.04±0.01    | 0.06±0.00     |
| LNDHF II | 0.04±0.01                   | 0.05±0.01   | 0.04±0.01    | 0.02±0.01   | 0.02±0.01   | 0.03±0.01   | *0.17±0.05                      | **0.15±0.03  | *0.16±0.04    | **0.13±0.03   | 0.18±0.07    | 0.10±0.07     |
| DFLNH    | 0.11±0.01a                  | 0.10±0.01ab | 0.10±0.01ab  | 0.10±0.01ab | 0.08±0.01ab | 0.06±0.00b  | **0.25±0.04                     | **0.36±0.07  | **0.35±0.07   | *0.37±0.09    | 0.26±0.12    | 0.10±0.09     |
| 3-FL     | 0.25±0.03d                  | 0.23±0.02d  | 0.33±0.03d   | 0.53±0.07c  | 0.77±0.09b  | 1.03±0.08a  | **0.60±0.11                     | **0.60±0.10  | **0.87±0.16   | *1.30±0.24    | 1.58±0.54    | 1.64±1.19     |
| LNFP II  | 0.12±0.02                   | 0.16±0.01   | 0.15±0.01    | 0.14±0.02   | 0.12±0.02   | 0.12±0.02   | **0.68±0.09                     | **0.87±0.11  | **0.84±0.16   | **0.48±0.07   | 0.68±0.14    | *0.30±0.00    |
| LNnFP    | 0.21±0.02a                  | 0.20±0.03a  | 0.14±0.02ab  | 0.08±0.01bc | 0.04±0.01c  | 0.01±0.00c  | **0.02±0.01                     | *0.11±0.04   | **0.05±0.02   | *0.03±0.01    | *0.01±0.00   | 0.02±0.01     |
| LNFP V   | 0.02±0.00ab                 | 0.04±0.01a  | 0.04±0.01a   | 0.02±0.00ab | 0.01±0.00b  | 0.01±0.00b  | **0.08±0.02                     | *0.10±0.02   | *0.08±0.01    | **0.05±0.01   | **0.04±0.01  | **0.03±0.01   |
| Total    | 0.77±0.05c                  | 0.77±0.03c  | 0.79±0.04c   | 0.92±0.09bc | 1.09±0.10b  | 1.30±0.09a  | **1.70±0.29                     | **1.97±0.35  | **2.22±0.43   | **2.30±0.45   | 2.63±0.90    | 2.11±1.48     |
| <b>B</b> |                             |             |              |             |             |             |                                 |              |               |               |              |               |
| LNDFH I  | 1.00±0.06a                  | 0.98±0.07a  | 0.83±0.05a   | 0.72±0.07ab | 0.54±0.07bc | 0.45±0.04c  | **0.09±0.02                     | **0.08±0.02  | **0.07±0.01   | **0.09±0.03   | **0.06±0.01  | **0.06±0.01   |
| A-Type-6 | 0.40±0.03a                  | 0.33±0.03ab | 0.24±0.02b   | 0.29±0.03ab | 0.32±0.04ab | 0.30±0.02ab | *0.59±0.06x                     | *0.48±0.06xy | 0.38±0.06xy   | 0.33±0.05xy   | 0.23±0.08y   | 0.32±0.13xy   |
| LDFT     | 0.38±0.05                   | 0.22±0.01   | 0.20±0.02    | 0.24±0.05   | 0.22±0.03   | 0.22±0.03   | **0.02±0.01                     | **0.01±0.00  | **0.02±0.00   | **0.02±0.00   | *0.02±0.01   | *0.02±0.00    |
| 2'-FL    | 3.02±0.14a                  | 2.54±0.18ab | 2.35±0.15b   | 1.96±0.14bc | 1.56±0.15cd | 1.28±0.10d  | **0.05±0.01                     | **0.04±0.01  | **0.02±0.01   | **0.02±0.01   | **0.01±0.00  | **0.01±0.01   |
| LNFP I   | 1.44±0.08a                  | 1.49±0.12a  | 1.11±0.09a   | 0.77±0.07b  | 0.44±0.08b  | 0.40±0.09b  | **0.23±0.04                     | **0.31±0.06  | **0.34±0.06   | **0.25±0.04   | *0.13±0.04   | 0.18±0.03     |
| Total    | 6.23±0.19a                  | 5.56±0.34ab | 4.73±0.23bc  | 3.98±0.23cd | 3.08±0.25de | 2.64±0.18e  | **0.97±0.07x                    | **0.92±0.09x | **0.82±0.07xy | **0.68±0.09xy | **0.45±0.09y | **0.58±0.15xy |
| <b>C</b> |                             |             |              |             |             |             |                                 |              |               |               |              |               |
| LNT2     | 0.13±0.01a                  | 0.07±0.01b  | 0.04±0.00c   | 0.03±0.00c  | 0.03±0.00c  | 0.02±0.00c  | 0.14±0.02x                      | 0.08±0.01y   | 0.04±0.01yz   | 0.03±0.01yz   | *0.02±0.01z  | *0.01±0.01z   |
| LNnT     | 0.55±0.03a                  | 0.56±0.03a  | 0.43±0.03b   | 0.34±0.03bc | 0.25±0.03cd | 0.15±0.02d  | *0.72±0.07x                     | *0.74±0.07x  | *0.76±0.07x   | 0.46±0.07xy   | 0.27±0.03y   | 0.12±0.08y    |
| LNnH#    | 0.07±0.01ab                 | 0.08±0.01a  | 0.05±0.01abc | 0.04±0.01bc | 0.02±0.00cd | 0.01±0.00d  | *0.04±0.01                      | *0.04±0.01   | 0.03±0.01     | 0.02±0.01     | 0.03±0.02    | 0.00±0.00     |
| LNT      | 0.70±0.08bc                 | 1.05±0.06a  | 0.85±0.06ab  | 0.63±0.08bc | 0.44±0.08c  | 0.43±0.08c  | **1.69±0.17x                    | **1.82±0.15x | **1.80±0.21x  | 0.91±0.15xy   | *0.96±0.22xy | 0.48±0.24y    |
| LNnO     | 0.09±0.02ab                 | 0.13±0.02a  | 0.10±0.01ab  | 0.05±0.01bc | 0.03±0.01c  | 0.02±0.01c  | *0.23±0.05                      | **0.33±0.05  | *0.27±0.07    | 0.13±0.05     | 0.06±0.04    | 0.05±0.03     |
| Total    | 1.54±0.11b                  | 1.89±0.08a  | 1.47±0.08b   | 1.10±0.10c  | 0.78±0.11de | 0.62±0.09e  | **2.82±0.22x                    | **3.00±0.20x | **2.89±0.23x  | 1.55±0.22y    | *1.34±0.28y  | 0.66±0.20y    |
| <b>D</b> |                             |             |              |             |             |             |                                 |              |               |               |              |               |
| LSTc     | 0.75±0.05a                  | 0.65±0.05a  | 0.32±0.04b   | 0.18±0.03bc | 0.08±0.02c  | 0.01±0.00c  | *0.54±0.06x                     | *0.47±0.06x  | 0.23±0.04y    | *0.09±0.02y   | 0.05±0.03y   | 0.01±0.00y    |
| 6'-SL    | 0.50±0.03a                  | 0.63±0.03a  | 0.56±0.04a   | 0.32±0.04b  | 0.15±0.02c  | 0.06±0.01c  | 0.44±0.04x                      | 0.59±0.04x   | 0.56±0.05x    | 0.27±0.02y    | 0.16±0.02yz  | 0.06±0.03z    |
| 3'-SL    | 0.28±0.01a                  | 0.27±0.02a  | 0.24±0.01ab  | 0.20±0.02b  | 0.14±0.02c  | 0.13±0.02c  | 0.25±0.01xy                     | 0.27±0.02x   | 0.24±0.03xy   | 0.16±0.02yz   | 0.11±0.00z   | 0.08±0.00z    |
| LSTa     | 0.14±0.02a                  | 0.17±0.02a  | 0.08±0.01b   | 0.03±0.01b  | 0.01±0.00b  | 0.02±0.00b  | 0.15±0.03xy                     | 0.18±0.03x   | 0.08±0.02xy   | 0.04±0.01xy   | *0.02±0.00xy | 0.00±0.00y    |
| LSTb     | 0.05±0.00a                  | 0.05±0.00a  | 0.05±0.00a   | 0.05±0.01a  | 0.04±0.01ab | 0.03±0.00b  | **0.09±0.01                     | **0.09±0.01  | **0.09±0.01   | 0.06±0.01     | **0.07±0.00  | 0.04±0.00     |
| DSLNT    | 0.32±0.02a                  | 0.32±0.03a  | 0.30±0.03a   | 0.23±0.03a  | 0.14±0.02b  | 0.10±0.01b  | 0.35±0.03x                      | 0.36±0.03x   | 0.31±0.04x    | 0.16±0.02y    | 0.15±0.03y   | 0.10±0.03y    |
| DS-L     | 0.01±0.00                   | 0.03±0.02   | 0.02±0.01    | 0.00±0.00   | 0.00±0.00   | 0.00±0.00   | 0.00±0.00                       | 0.02±0.01    | 0.02±0.01     | 0.00±0.00     | 0.00±0.00    | 0.00±0.00     |
| Total    | 2.05±0.10a                  | 2.09±0.10a  | 1.55±0.09b   | 1.01±0.09c  | 0.56±0.07d  | 0.33±0.03d  | 1.82±0.10x                      | 1.97±0.11x   | 1.53±0.11x    | *0.77±0.06y   | 0.57±0.02y   | 0.30±0.02y    |

Changes of 24 HMOs as groups in subtypes (A) acidic HMOs, (B) non-fucosylated HMOs, (C)  $\alpha$ -1-3/4-fucosylated HMOs and (D)  $\alpha$ -1-2-fucosylated HMOs on day3, 7, 21, 42, 77 and 168 during lactation. All values are means  $\pm$  SEMs. "LNnH#" was a mixture of p-LNnH & LNnH. "a", "b", ... and "x", "y", ... indicated differences among different time points in secretors and non-secretors, respectively. Asterisks indicated statistical significance between secretors and non-secretors at the same lactation time.

\*  $P < 0.05$ , \*\*  $P < 0.01$ , and \*\*\*  $P < 0.001$ .
